# Supplementary material for: Halogen substituted bithiophene-based polycatenars with tunable fluorescence
Source: Royal Society of Chemistry journal article supplement (doi:10.1039/d4ma00771a), 2024-01-01
Supplement: d4ma00771a1.pdf [file d4ma00771a1.pdf]

# Halogen substituted bithiophene-based polycatenars with tunable fluorescence

Mohamed Alaasar,<sup>a,b\*</sup> Yu Cao,<sup>c,d</sup> Thorben Neumann,<sup>e</sup> Tianyi Tan,<sup>c</sup> Feng Liu,<sup>c</sup>  
Michael Giese,<sup>e\*</sup>

<sup>a</sup>Institute of Chemistry, Martin Luther University Halle-Wittenberg, 06120 Halle, Germany

<sup>b</sup>Department of Chemistry, Faculty of Science, Cairo University, 12613 Giza, Egypt

<sup>c</sup>Shaanxi International Research Center for Soft Matter, State Key Laboratory for Mechanical Behavior of Materials, Xi'an Jiaotong University, Xi'an 710049, P. R. China

<sup>d</sup>Guangdong Provincial Key Laboratory of Functional and Intelligent Hybrid Materials and Devices, Guangzhou 510641, China

<sup>e</sup>Organic Chemistry, University of Duisburg Essen, Universitätsstraße 7, Essen 45117, Germany

## Contents

1. Synthesis
2. NMR Spectra
3. DSC Thermograms
4. XRD
5. Fluorescence spectroscopy
6. References

## 1. Synthesis

### Synthesis of the target polycatenars AXY.

**General procedure.** A solution of 4-*n*-hexyloxysubstituted benzoic acid **1XY** [1] (1 equivalent) in 2 mL SOCl<sub>2</sub> and two drops of *N,N*-dimethylformamide (DMF) was refluxed for 1 hour. The excess thionyl chloride was removed under reduced pressure. The phenol **2** [2] (1 equivalent) previously dissolved in 25 mL of dichloromethane (DCM) together with triethylamine (1.2 equivalent) and a catalytic amount of pyridine were added to the acid chloride. The mixture was refluxed for 6 hours and monitored by TLC. Extraction was performed with DCM and the organic layer was washed with water, dried over anhydrous Na<sub>2</sub>SO<sub>4</sub> followed by removal of the solvent under reduced pressure. The obtained crude material was purified using column chromatography using CHCl<sub>3</sub>/*n*-Hexane 4:1 followed by a final step of recrystallization from ethanol/chloroform mixture (2:1) to afford the desired materials as yellow crystals.

### 4-(5'-(4-((3,5-bis(heptyloxy)benzoyl)oxy)phenyl)-[2,2'-bithiophen]-5-yl)phenyl-3-fluoro-4-(hexyloxy)benzoate, AFH

Yellow crystals. Yield 73.75%; <sup>1</sup>H NMR (400 MHz, CDCl<sub>3</sub>) δ 7.97 (dt, *J* = 8.4, 1.6 Hz, 1H), 7.91 (dd, *J* = 11.5, 2.1 Hz, 1H), 7.65 (d, *J* = 8.4 Hz, 4H, Ar-H), 7.32 (d, *J* = 2.3 Hz, 2H, Ar-H), 7.29 – 7.14 (m, 8H, Ar-H overlapped with CHCl<sub>3</sub> signal), 7.04 (t, *J* = 8.3 Hz, 1H, Ar-H), 6.72 (t, *J* = 2.3 Hz, 1H, Ar-H), 4.13 (t, *J* = 6.6 Hz, 2H, Ar-OCH<sub>2</sub>-), 4.01 (t, *J* = 6.5 Hz, 4H, Ar-OCH<sub>2</sub>-), 1.93 – 1.74 (m, 6H, Ar-OCH<sub>2</sub>CH<sub>2</sub>-), 1.60 – 1.23 (m, 22H, 2 x 11 CH<sub>2</sub>), 0.99 – 0.82 (m, 9H, 3 x CH<sub>3</sub>). <sup>13</sup>C NMR (126 MHz, CDCl<sub>3</sub>) δ 165.16 (C=O), 164.16 (d, <sup>4</sup>*J*<sub>C,F</sub> = 2.5 Hz, C=O), 160.49 (2C, C<sub>ar</sub>-O), 153.07, 152.24, 152.16, 151.10, 150.62, 150.51 (4C, including 2d, C<sub>ar</sub>-O, C<sub>ar</sub>-F), 142.45, 142.41, 136.98, 136.96, 132.07, 132.04, 131.19, 127.58, 127.55 (C<sub>ar</sub>),<sup>a</sup> 126.87 (4C, C<sub>ar</sub>-H), 124.76 (2C, C<sub>ar</sub>) 124.23, 124.21 (C<sub>ar</sub>),<sup>a</sup> 122.41, 122.38 (2x2C, C<sub>ar</sub>-H), 121.89, 121.84, 118.07, 117.91, 113.63, 113.62 (C<sub>ar</sub>),<sup>a</sup> 108.40 (2C, C<sub>ar</sub>-H), 107.40 (C<sub>ar</sub>-H), 69.64 (OCH<sub>2</sub>), 68.61 (2C, OCH<sub>2</sub>), 31.93 (2C, CH<sub>2</sub>), 31.65 (CH<sub>2</sub>), 29.35 (2C, CH<sub>2</sub>), 29.19 (2C, CH<sub>2</sub>), 29.12 (CH<sub>2</sub>), 26.14 (2C, CH<sub>2</sub>), 25.70 (CH<sub>2</sub>), 22.76 (2C, CH<sub>2</sub>), 22.71 (CH<sub>2</sub>), 14.23 (2C, CH<sub>3</sub>), 14.15 (CH<sub>3</sub>);<sup>a</sup> among the C<sub>ar</sub> signals there are 4d due to the coupling with F; C<sub>ar</sub> involves quaternary carbons as well as C<sub>ar</sub>-H. <sup>19</sup>F NMR (470 MHz, CDCl<sub>3</sub>) δ -133.58 (dd, *J* = 11.4, 8.0 Hz). EA: calculated for C<sub>54</sub>H<sub>61</sub>FO<sub>7</sub>S<sub>2</sub>: C 71.65%, H 6.79%; found: C 71.58%, H 6.77%.

**4-(5'-(4-((3,5-bis(heptyloxy)benzoyl)oxy)phenyl)-[2,2'-bithiophen]-5-yl)phenyl-2-fluoro-4-(hexyloxy)benzoate, AHF**

Yellow crystals. Yield 74.98%; <sup>1</sup>H NMR (400 MHz, CDCl<sub>3</sub>) δ 8.05 (t, *J* = 8.6 Hz, 1H, Ar-H), 7.73 – 7.57 (m, 4H, Ar-H), 7.36 – 7.13 (m, 10H, Ar-H overlapped with CHCl<sub>3</sub> signal), 6.78 (dd, *J* = 8.9, 2.4 Hz, 1H, Ar-H), 6.75 – 6.65 (m, 2H, Ar-H), 4.10 – 3.95 (m, 6H, Ar-OCH<sub>2</sub>-), 1.88 – 1.73 (m, 6H, Ar-OCH<sub>2</sub>CH<sub>2</sub>-), 1.64 – 1.21 (m, 22H, 2 x 11 CH<sub>2</sub>), 1.00 – 0.82 (m, 9H, 3 x 3 CH<sub>3</sub>). <sup>13</sup>C NMR (126 MHz, CDCl<sub>3</sub>) δ 165.16 (C=O), 162.63 (d, <sup>4</sup>*J*<sub>C,F</sub> = 4.6 Hz, C=O), 160.50, (2 x OAr), 152.91, 152.25, 151.68, 151.12, 150.61, 150.42, (4C, including 2d, C<sub>ar</sub>-O, C<sub>ar</sub>-F), 142.52, 142.42, 137.00, 136.92, 134.01, 133.99, 132.06, 131.98, 131.20 (C<sub>ar</sub>),<sup>a</sup> 126.87, 126.82 (2 x 2C, C<sub>ar</sub>-H), 124.76, 124.75 (C, C<sub>ar</sub>), 124.21, 124.19 (C<sub>ar</sub>),<sup>a</sup> 122.49, 122.41 (2 x 2C, C<sub>ar</sub>-H), 110.06, 110.04 (C<sub>ar</sub>),<sup>a</sup> 108.41 (2C, C<sub>ar</sub>-H), 107.41, 103.15, 102.95 (C, C<sub>ar</sub>-H), 69.02 (OCH<sub>2</sub>), 68.61 (2C, OCH<sub>2</sub>), 31.93 (2C, CH<sub>2</sub>), 31.65 (CH<sub>2</sub>), 29.35 (2C, CH<sub>2</sub>), 29.19 (2C, CH<sub>2</sub>), 29.06 (CH<sub>2</sub>), 26.14 (2C, CH<sub>2</sub>), 25.75 (CH<sub>2</sub>), 22.76 (2C, CH<sub>2</sub>), 22.72 (CH<sub>2</sub>), 14.23 (2C, CH<sub>3</sub>), 14.15 (CH<sub>3</sub>);<sup>a</sup> among the C<sub>ar</sub> signals there are 4d due to the coupling with F; C<sub>ar</sub> involves quaternary carbons as well as C<sub>ar</sub>-H. <sup>19</sup>F NMR (470 MHz, CDCl<sub>3</sub>) δ -104.55 (dd, *J* = 12.6, 8.5 Hz). EA: calculated for C<sub>54</sub>H<sub>61</sub>FO<sub>7</sub>S<sub>2</sub>: C 71.65%, H 6.79%; found: C 71.60%, H 6.75%.

**4-(5'-(4-((3,5-bis(heptyloxy)benzoyl)oxy)phenyl)-[2,2'-bithiophen]-5-yl)phenyl-2,3-difluoro-4-(hexyloxy)benzoate, AFF**

Yellow crystals. Yield 73.62%; <sup>1</sup>H NMR (500 MHz, CDCl<sub>3</sub>) δ 7.86 (ddd, *J* = 9.7, 7.6, 2.2 Hz, 1H, Ar-H), 7.69 – 7.63 (m, 4H, Ar-H), 7.33 (d, *J* = 2.3 Hz, 2H, Ar-H), 7.29 – 7.21 (m, 7H, Ar-H overlapped with CHCl<sub>3</sub> signal), 7.19 (d, *J* = 3.7 Hz, 2H, Ar-H), 6.87 – 6.80 (m, 1H, Ar-H), 6.72 (t, *J* = 2.3 Hz, 1H, Ar-H), 4.15 (t, *J* = 6.6 Hz, 2H, Ar-OCH<sub>2</sub>-), 4.02 (t, *J* = 6.5 Hz, 4H, Ar-OCH<sub>2</sub>CH<sub>2</sub>-), 1.93 – 1.75 (m, 6H), 1.59 – 1.27 (m, 22H, 2 x 11 CH<sub>2</sub>), 0.98 – 0.85 (m, 9H, 3 x 3 CH<sub>3</sub>). <sup>13</sup>C NMR (126 MHz, CDCl<sub>3</sub>) δ 165.16 (C=O), 162.16 -162.10 (m, C=O), 160.50 (2C, C<sub>ar</sub>-O), 153.12, 153.03, 151.03, 150.94, 150.62, 150.21 (4C, including 2d, C<sub>ar</sub>-O, C<sub>ar</sub>-F), 142.46, 142.37, 137.02, 137.95, 132.19, 132.05, 131.20, 127.21, 127.18 (C<sub>ar</sub>),<sup>a</sup> 126.87, 126.85 (2x2C, C<sub>ar</sub>-H), 124.78, 124.76 (C, C<sub>ar</sub>), 124.27 (2C, C<sub>ar</sub>), 124.22 (C<sub>ar</sub>),<sup>a</sup> 122.41, 122.37 (2x2C, C<sub>ar</sub>-H), 111.40, 111.34, 108.64, 108.62 (C<sub>ar</sub>),<sup>a</sup> 108.41 (2C, C<sub>ar</sub>-H), 107.41 (C<sub>ar</sub>), 70.16 (OCH<sub>2</sub>), 68.61 (2C, OCH<sub>2</sub>), 31.93 (2C, CH<sub>2</sub>), 31.61 (CH<sub>2</sub>), 29.35 (2C, CH<sub>2</sub>), 29.19 (2C, CH<sub>2</sub>), 29.06 (CH<sub>2</sub>), 26.14 (2C, CH<sub>2</sub>), 25.63 (CH<sub>2</sub>), 22.76 (2C, CH<sub>2</sub>), 22.69 (CH<sub>2</sub>), 14.23 (2C, CH<sub>3</sub>), 14.19 (CH<sub>3</sub>);<sup>a</sup> among the C<sub>ar</sub> signals there are 4d due to the coupling with F; C<sub>ar</sub> involves quaternary carbons as well as C<sub>ar</sub>-H. <sup>19</sup>F NMR (470 MHz, CDCl<sub>3</sub>) δ -132.04 – -132.14 (m), -157.94 (ddd,

$J = 19.6, 7.1, 2.4$  Hz). EA: calculated for  $C_{54}H_{60}F_2O_7S_2$ : C 70.25%, H 6.55%; found: C 70.19%, H 6.54%.

**4-(5'-(4-((3,5-bis(heptyloxy)benzoyl)oxy)phenyl)-[2,2'-bithiophen]-5-yl)phenyl-2-chloro-4-(hexyloxy)benzoate, AHCl**

Yellow crystals. Yield 73.50%;  $^1H$  NMR (500 MHz,  $CDCl_3$ )  $\delta$  8.11 (d,  $J = 8.8$  Hz, 1H, Ar-H), 7.69 – 7.63 (m, 4H, Ar-H), 7.33 (d,  $J = 2.3$  Hz, 2H, Ar-H), 7.30 – 7.21 (m, 6H, Ar-H overlapped with  $CHCl_3$  signal), 7.19 (d,  $J = 3.8$  Hz, 2H, Ar-H), 7.04 (d,  $J = 2.5$  Hz, 1H, Ar-H), 6.90 (dd,  $J = 8.9, 2.5$  Hz, 1H, Ar-H), 6.72 (t,  $J = 2.3$  Hz, 1H, Ar-H), 4.09 – 3.96 (m, 6H, Ar-O $\underline{CH_2}$ -), 1.86 – 1.75 (m, 6H, Ar-O $\underline{CH_2CH_2}$ -), 1.58 – 1.27 (m, 22H, 2 x 11  $CH_2$ ), 0.98 – 0.86 (m, 9H, 3 x 3  $CH_3$ ).  $^{13}C$  NMR (126 MHz,  $CDCl_3$ )  $\delta$  165.16, 163.49 (C=O), 162.99 (C,  $C_{ar}$ -O), 160.50 (2C,  $C_{ar}$ -O), 150.61, 150.45, 142.48, 142.43, 136.98, 136.96, 134.17, 132.04, 131.20 ( $C_{ar}$ ),<sup>a</sup> 126.87, 126.84 (2x2C,  $C_{ar}$ -H), 124.76 (2x2C,  $C_{ar}$ ),<sup>a</sup> 124.21 (2x2C,  $C_{ar}$ ),<sup>a</sup> 122.46, 122.41 (2x2C,  $C_{ar}$ -H), 120.34, 117.39, 113.34 ( $C_{ar}$ ),<sup>a</sup> 108.40 (2C,  $C_{ar}$ -H), 107.41( $C_{ar}$ ),<sup>a</sup> 68.89 (O $\underline{CH_2}$ ), 68.61 (2C, O $\underline{CH_2}$ ), 31.93 (2C,  $CH_2$ ), 31.65, 29.35 (2C,  $CH_2$ ), 29.19 (2C,  $CH_2$ ), 29.09 ( $CH_2$ ), 26.14 (2C,  $CH_2$ ), 25.74 ( $CH_2$ ), 22.76 (2C,  $CH_2$ ), 22.72 ( $CH_2$ ), 14.23 (2C,  $CH_3$ ), 14.16 ( $CH_3$ ).<sup>a</sup>  $C_{ar}$  involves quaternary carbons as well as  $C_{ar}$ -H. EA: calculated for  $C_{54}H_{61}ClO_7S_2$ : C 70.37%, H 6.67%; found: C 70.29%, H 6.61%.

**4-(5'-(4-((3,5-bis(heptyloxy)benzoyl)oxy)phenyl)-[2,2'-bithiophen]-5-yl)phenyl-2-bromo-4-(hexyloxy)benzoate, AHBr**

Yellow crystals. Yield 72.99%;  $^1H$  NMR (400 MHz,  $CDCl_3$ )  $\delta$  8.11 (d,  $J = 8.8$  Hz, 1H, Ar-H), 7.70 – 7.63 (m, 4H, Ar-H), 7.33 (d,  $J = 2.3$  Hz, 2H, Ar-H), 7.30 – 7.21 (m, 6H, Ar-H overlapped with  $CHCl_3$  signal), 7.19 (d,  $J = 3.8$  Hz, 2H, Ar-H), 7.04 (d,  $J = 2.5$  Hz, 1H, Ar-H), 6.90 (dd,  $J = 8.9, 2.5$  Hz, 1H, Ar-H), 6.72 (t,  $J = 2.3$  Hz, 1H, Ar-H), 4.15 – 3.92 (m, 6H, Ar-O $\underline{CH_2}$ -), 1.94 – 1.68 (m, 6H, Ar-O $\underline{CH_2CH_2}$ -), 1.66 – 1.17 (m, 22H, 2 x 11  $CH_2$ ), 1.01 – 0.81 (m, 9H, 3 x 3  $CH_3$ ).  $^{13}C$  NMR (101 MHz,  $CDCl_3$ )  $\delta$  165.16, 163.84 (C=O), 162.76 (C,  $C_{ar}$ -O), 160.49 (2C,  $C_{ar}$ -O), 150.61, 150.45, 142.46, 142.43, 136.97, 134.09, 132.06, 131.20 ( $C_{ar}$ ),<sup>a</sup> 126.86, 126.85 (2x2C,  $C_{ar}$ -H), 124.76 (2C,  $C_{ar}$ ),<sup>a</sup> 124.68 (C,  $C_{ar}$ ),<sup>a</sup> 124.22 (2C,  $C_{ar}$ ),<sup>a</sup> 122.44, 122.41 (2x2C,  $C_{ar}$ -H), 122.11 ( $C_{ar}$ ),<sup>a</sup> 120.88 (2C,  $C_{ar}$ ),<sup>a</sup> 113.77 ( $C_{ar}$ ),<sup>a</sup> 108.40 (2C,  $C_{ar}$ -H), 107.40 ( $C_{ar}$ ),<sup>a</sup> 68.89 (O $\underline{CH_2}$ ), 68.61 (2C, O $\underline{CH_2}$ ), 31.93 (2C,  $CH_2$ ), 31.65, 29.35 (2C,  $CH_2$ ), 29.19 (2C,  $CH_2$ ), 29.10 ( $CH_2$ ), 26.14 (2C,  $CH_2$ ), 25.74 ( $CH_2$ ), 22.76 (2C,  $CH_2$ ), 22.72 ( $CH_2$ ), 14.23 (2C,  $CH_3$ ), 14.16 ( $CH_3$ ).<sup>a</sup>  $C_{ar}$  involves quaternary carbons as well as  $C_{ar}$ -H. EA: calculated for  $C_{54}H_{61}BrO_7S_2$ : C 67.13%, H 6.36%; found: C 67.08%, H 6.30%.

## 2. NMR Spectra

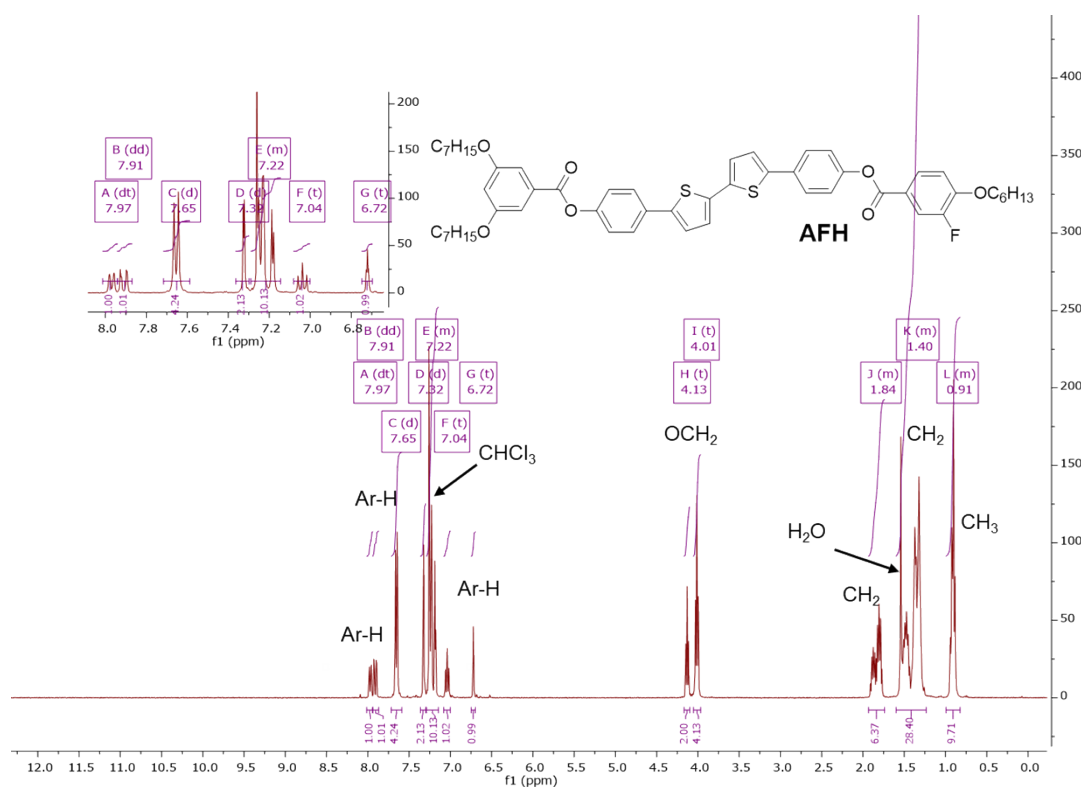

**Figure S1. <sup>1</sup>H-NMR Spectrum of AFH in CDCl<sub>3</sub>.**

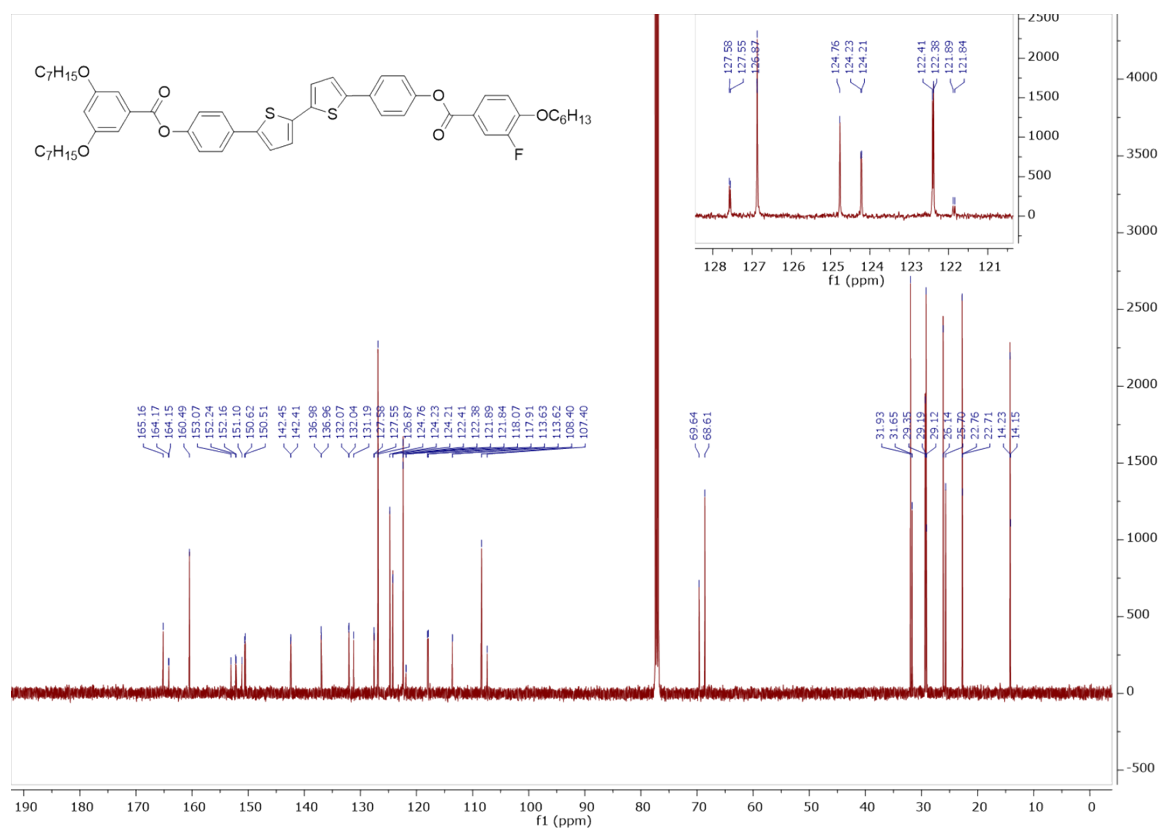

**Figure S2. <sup>13</sup>C-NMR Spectrum of AFH in CDCl<sub>3</sub>.**

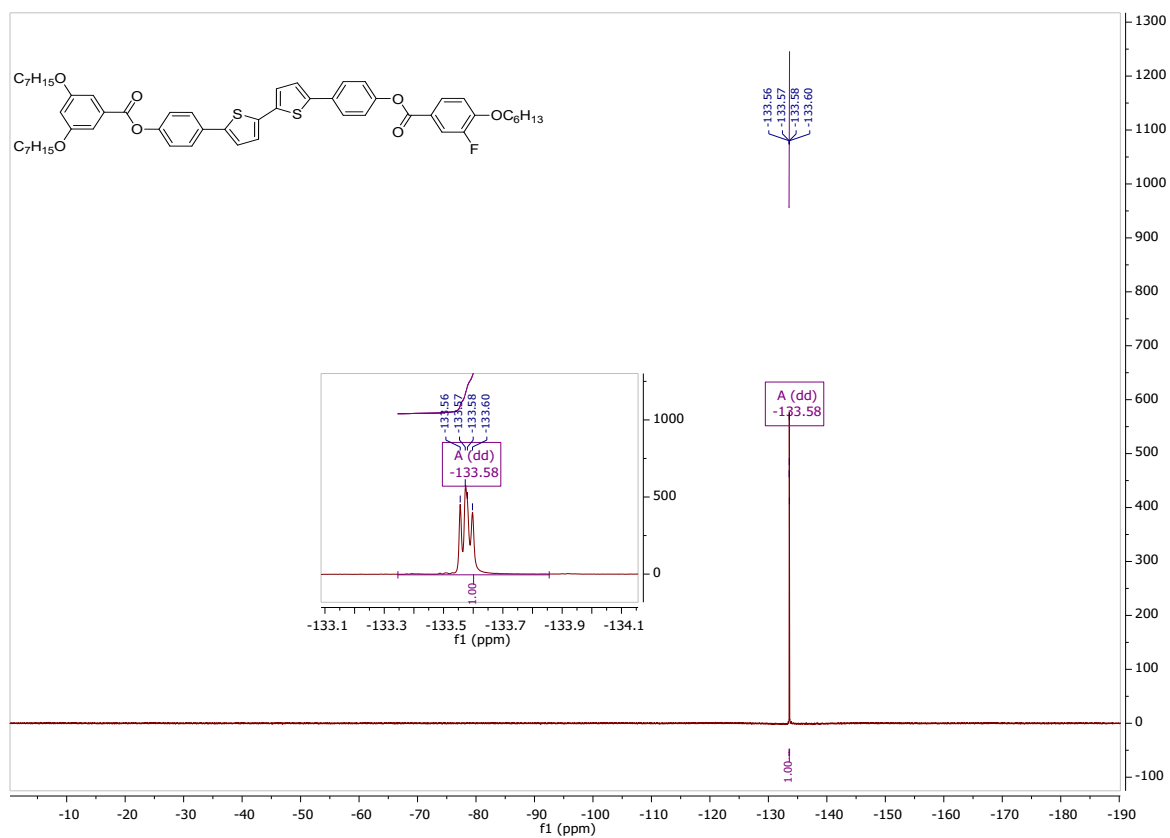

Figure S3.  $^{19}\text{F}$ -NMR Spectrum of AFH in  $\text{CDCl}_3$ .

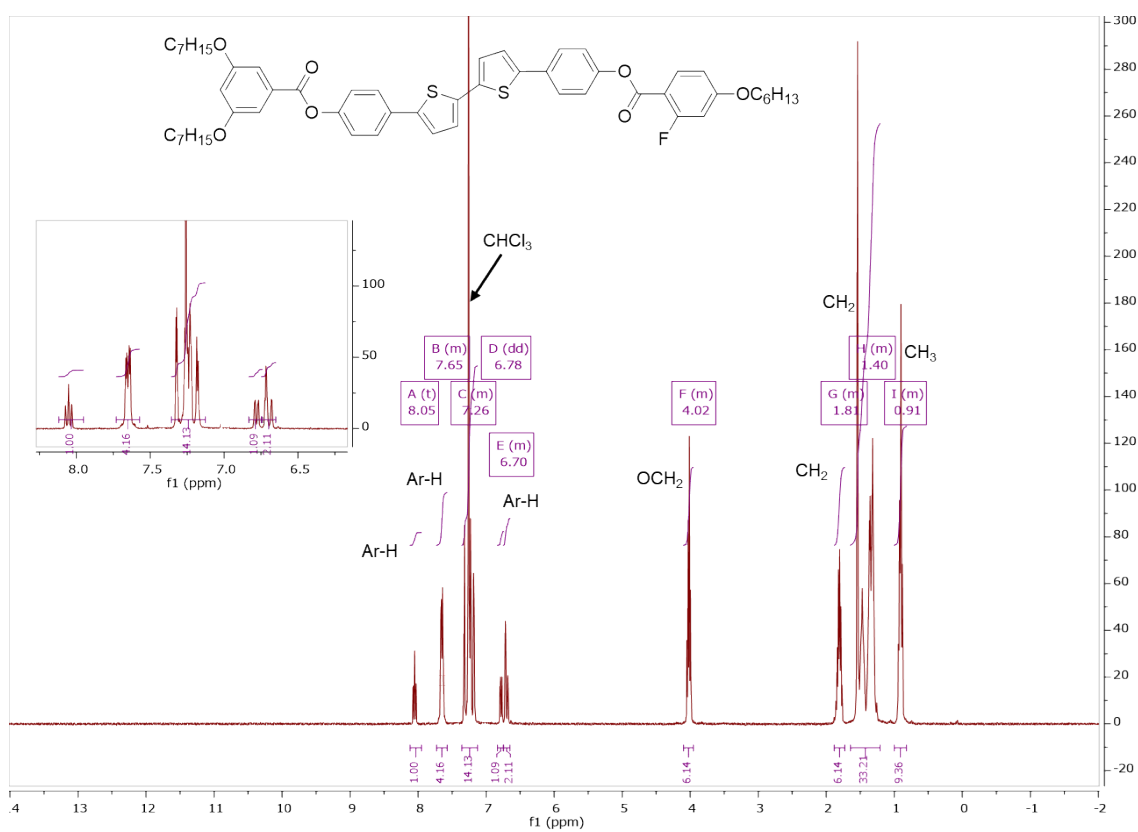

Figure S4.  $^1\text{H}$ -NMR Spectrum of AHF in  $\text{CDCl}_3$ .

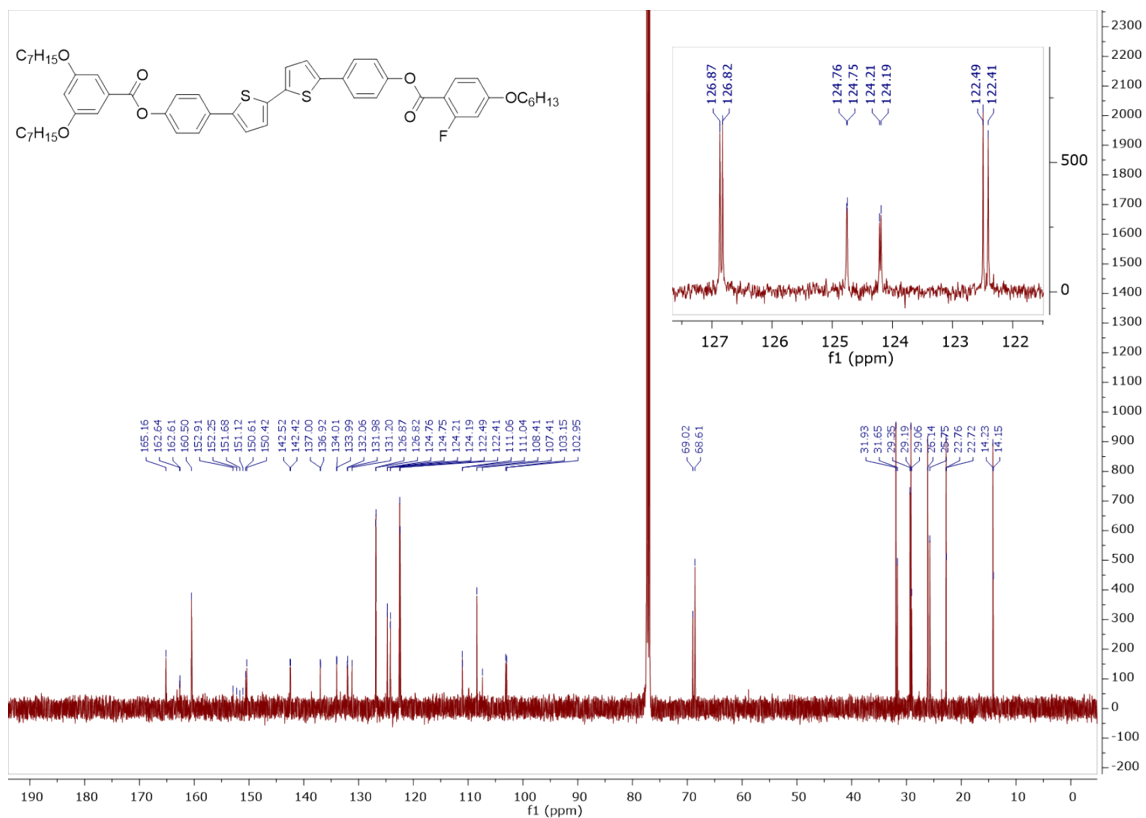

Figure S5.  $^{13}\text{C}$ -NMR Spectrum of AHF in  $\text{CDCl}_3$ .

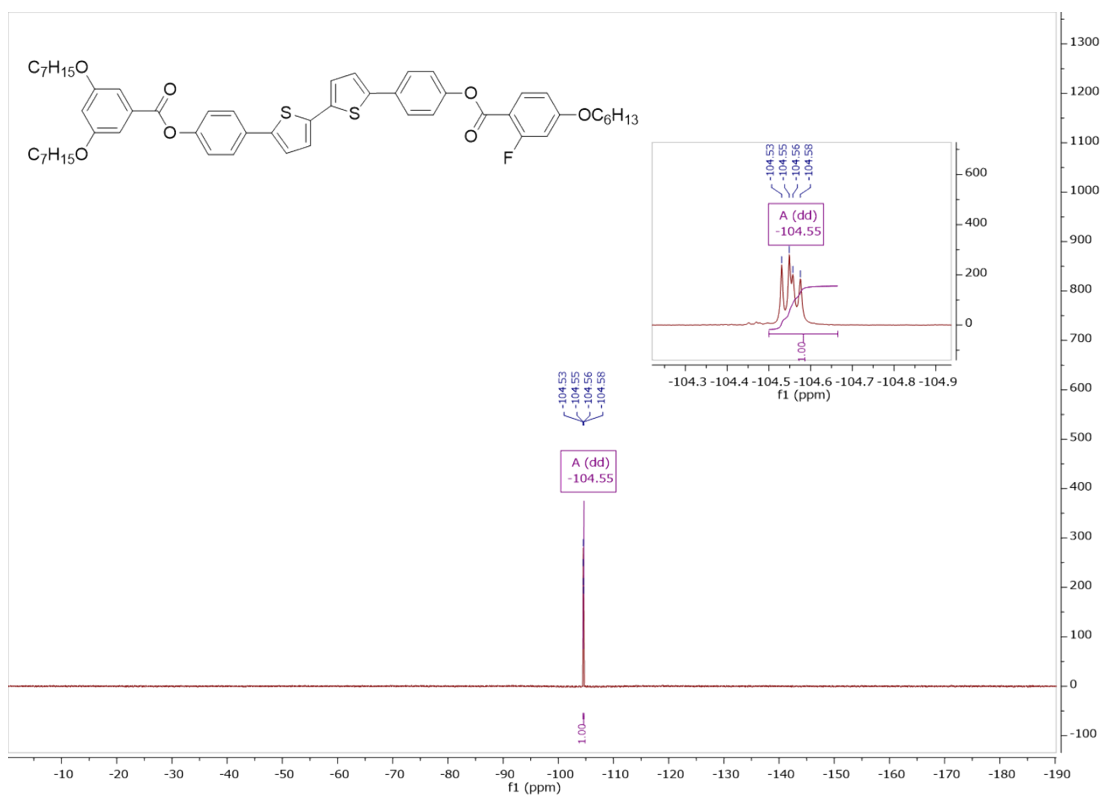

Figure S6.  $^{19}\text{F}$ -NMR Spectrum of AHF in  $\text{CDCl}_3$ .

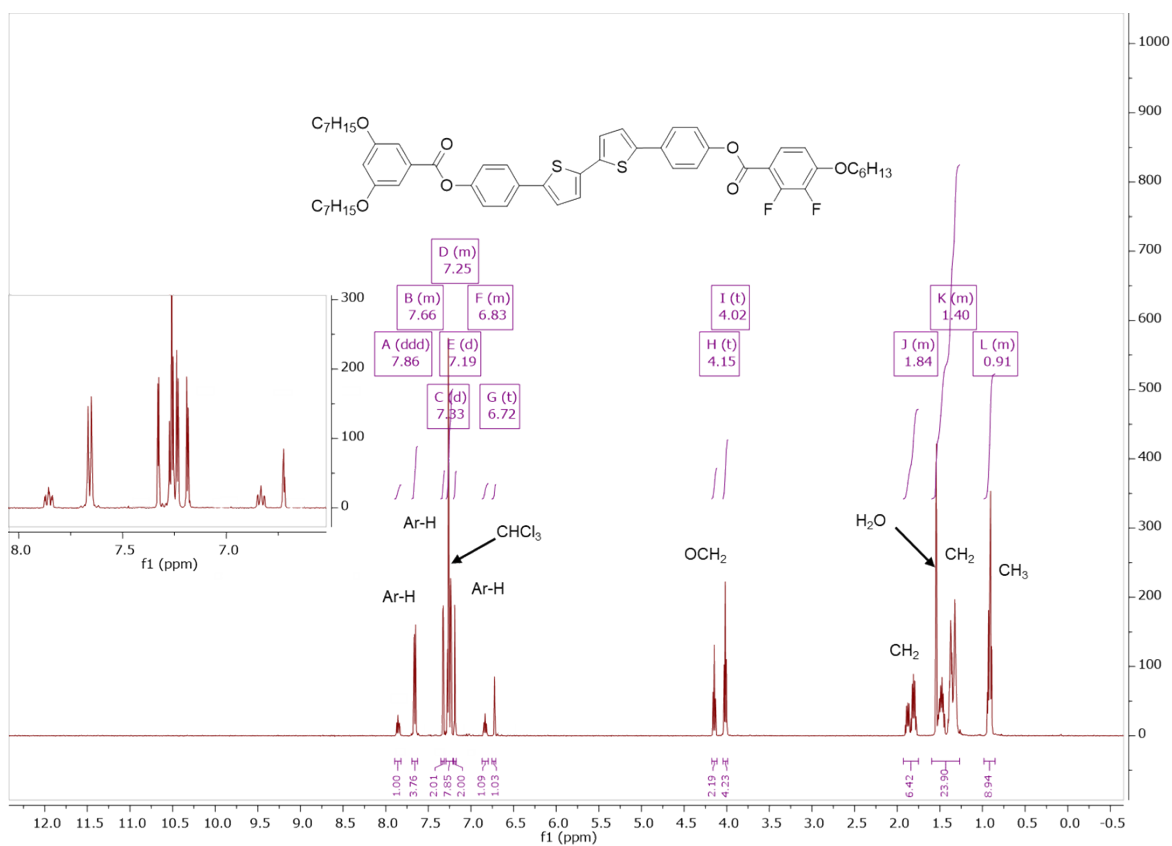

**Figure S7. <sup>1</sup>H-NMR Spectrum of AFF in CDCl<sub>3</sub>.**

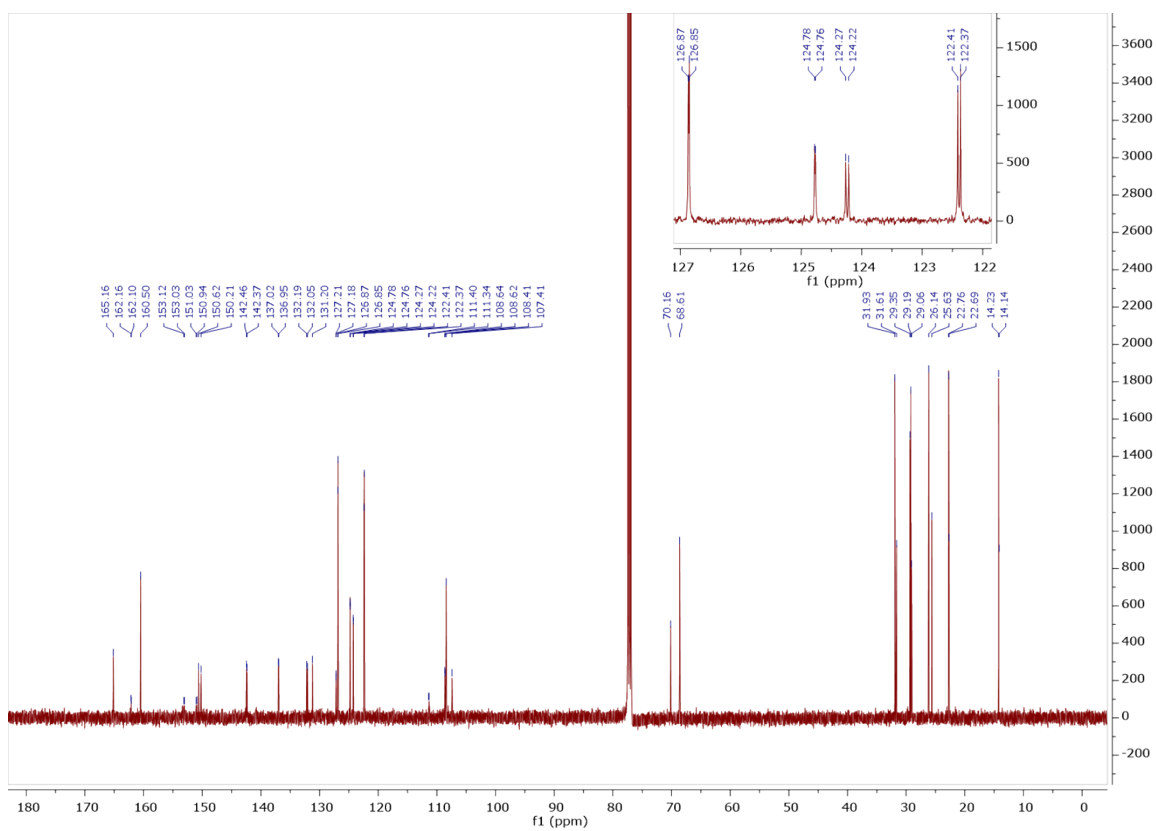

**Figure S8. <sup>13</sup>C-NMR Spectrum of AFF in CDCl<sub>3</sub>.**



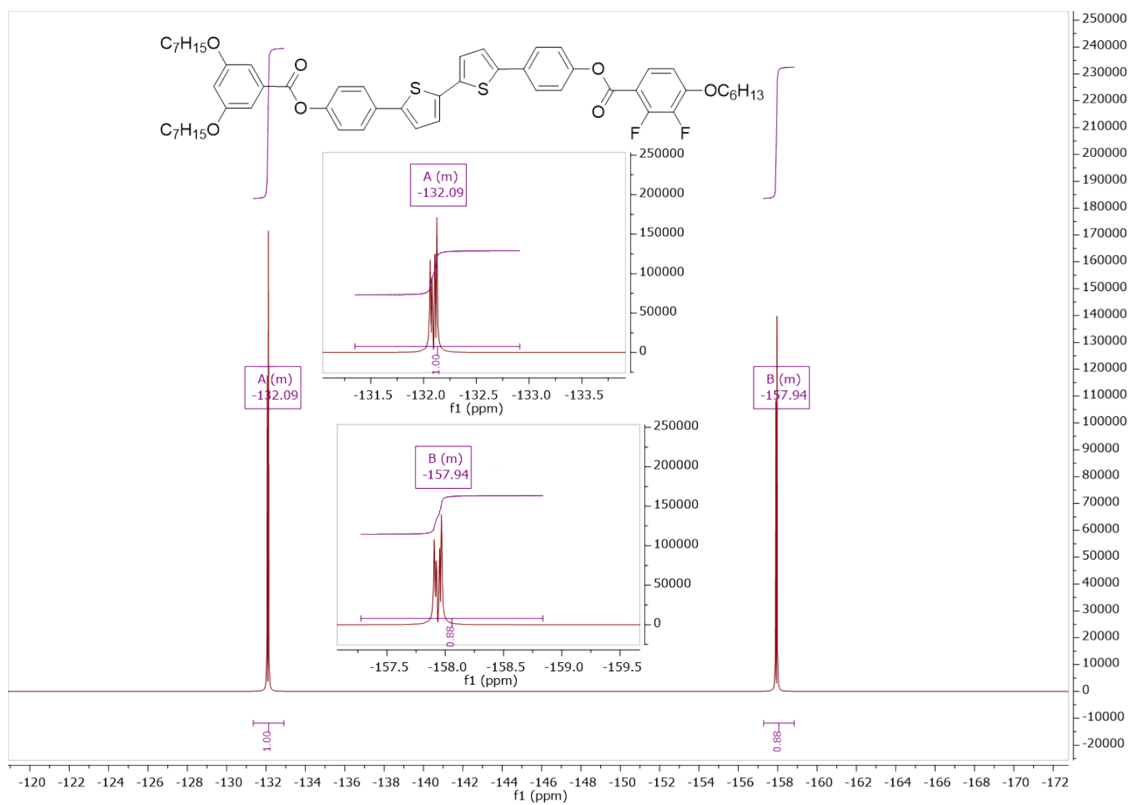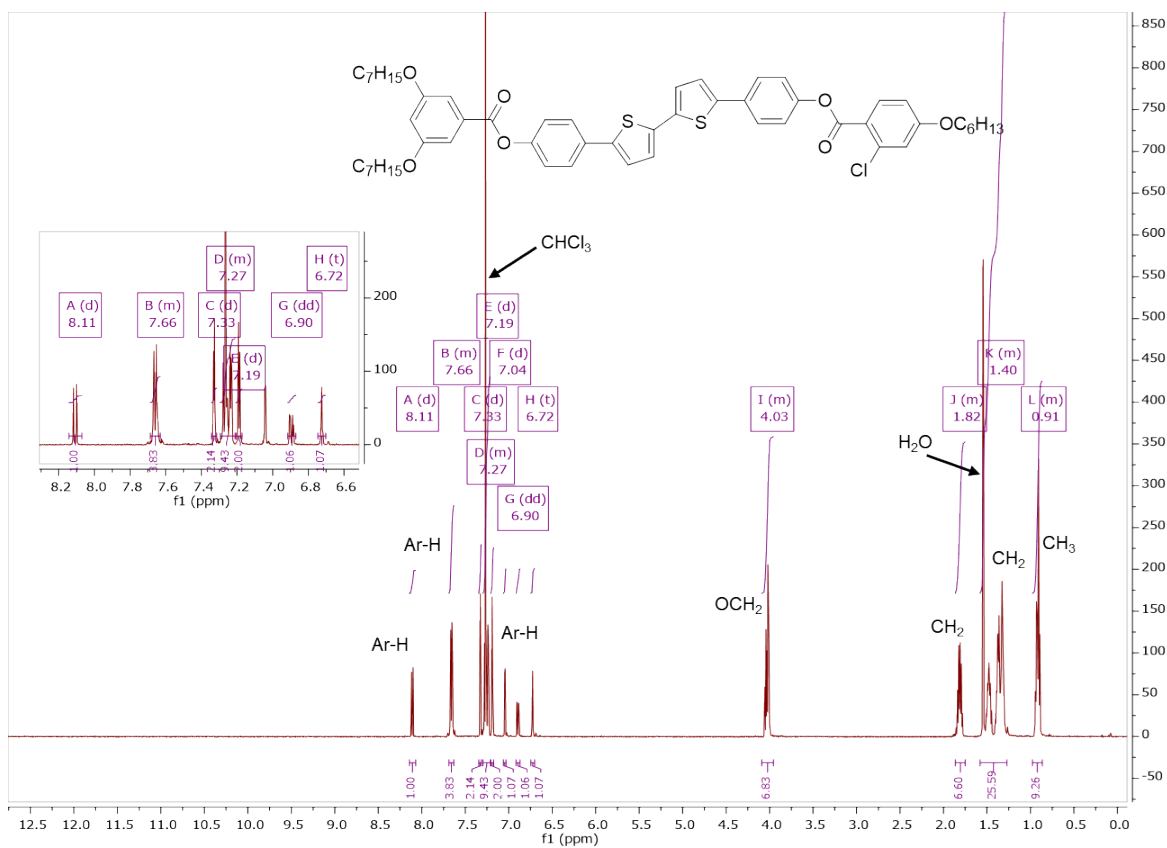

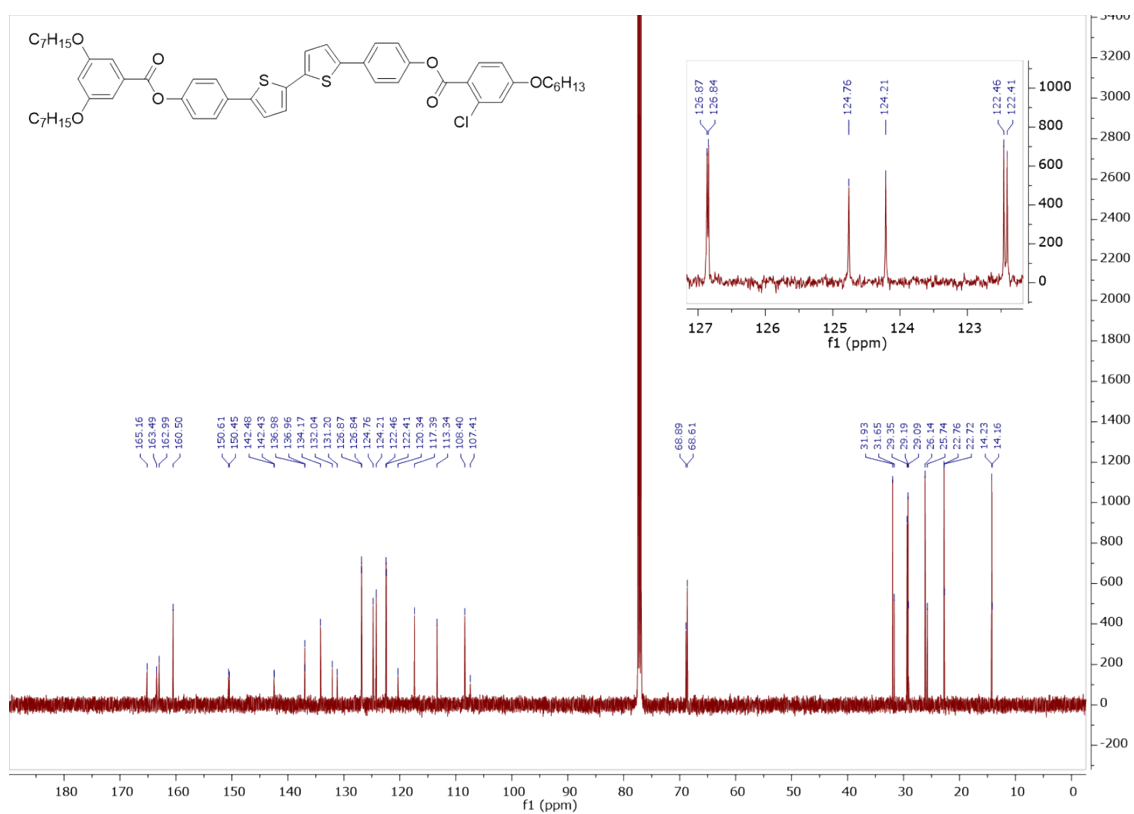

Figure S11. <sup>13</sup>C-NMR Spectrum of AHCl in CDCl<sub>3</sub>.

Fig

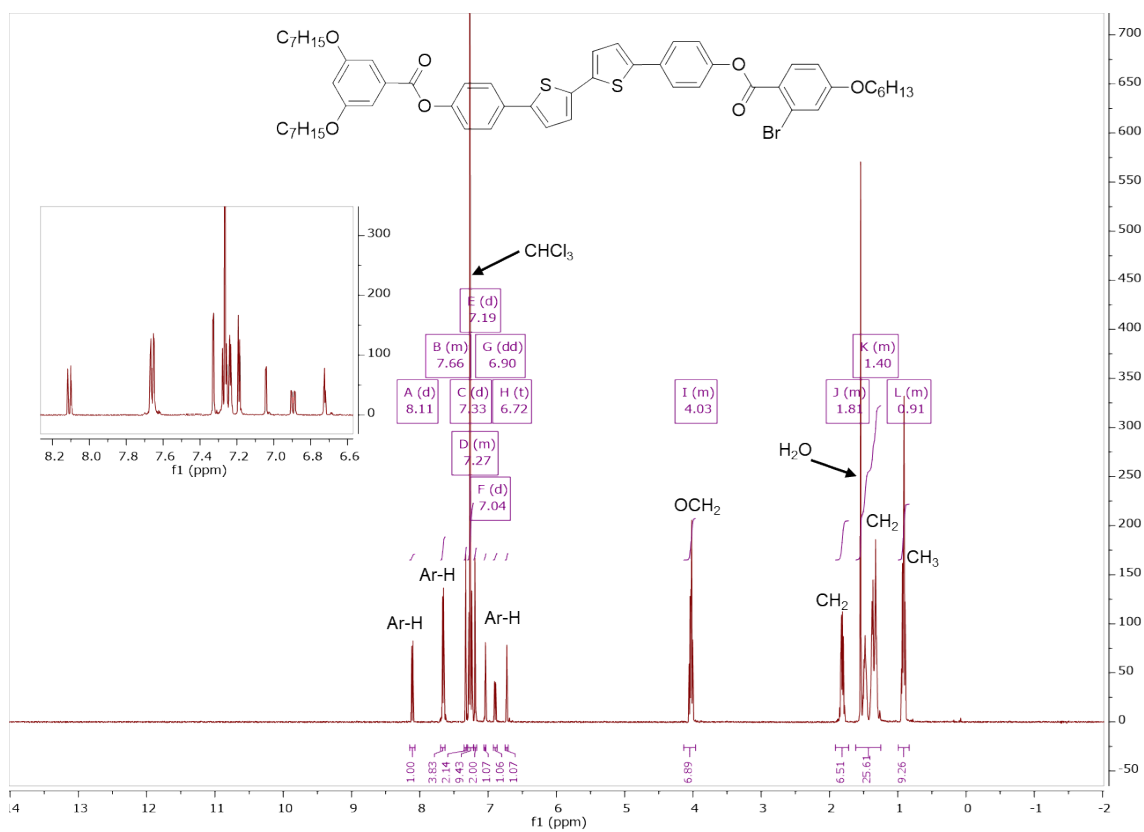

Figure S12. <sup>1</sup>H-NMR Spectrum of AHBr in CDCl<sub>3</sub>.

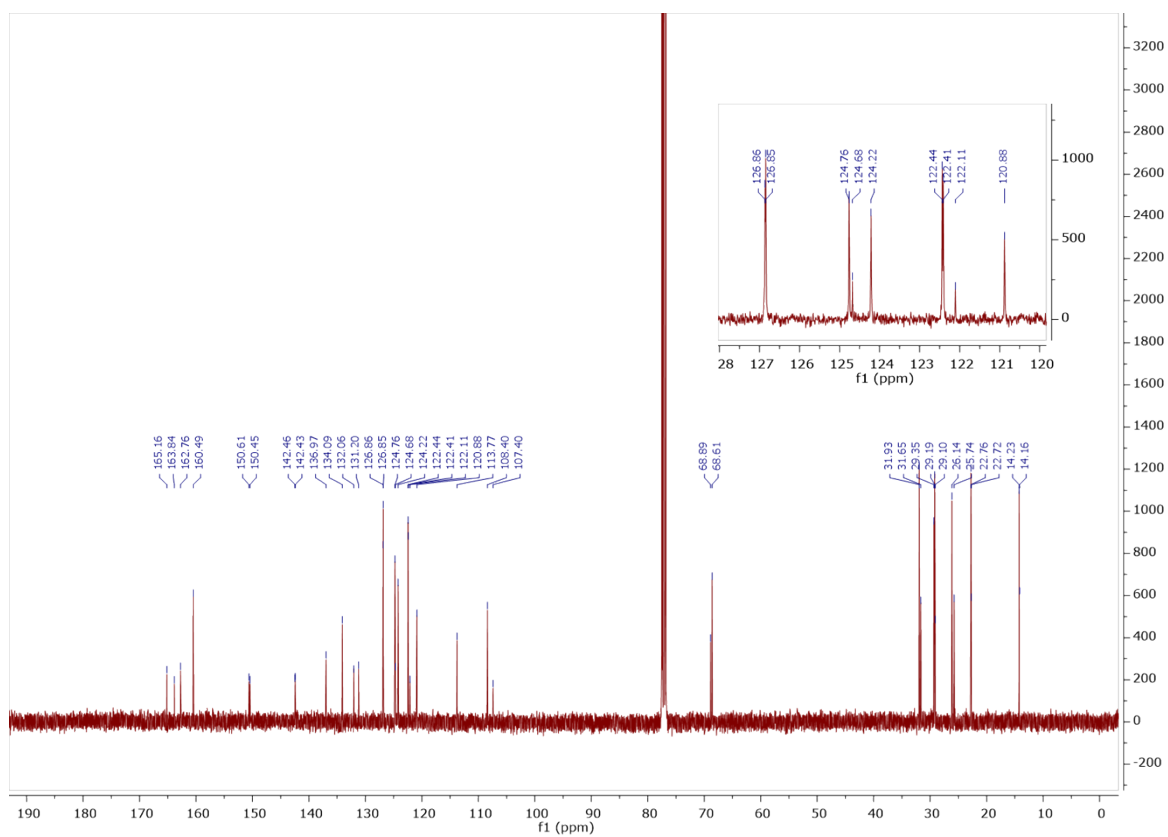

Figure S13.  $^{13}\text{C}$ -NMR Spectrum of AHBr in  $\text{CDCl}_3$ .

### 3. DSC Thermograms

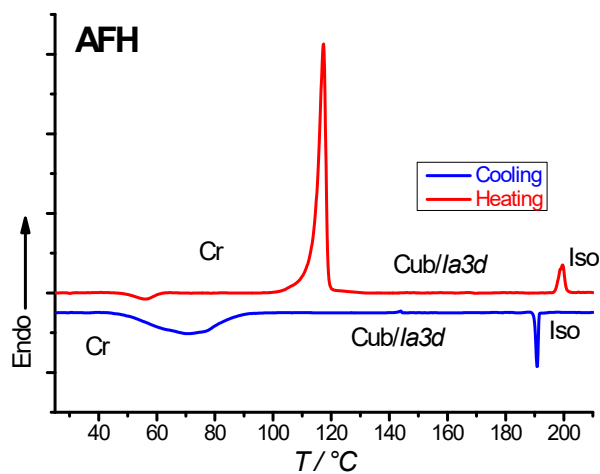

Figure S14. DSC heating and cooling traces for compound AFH.

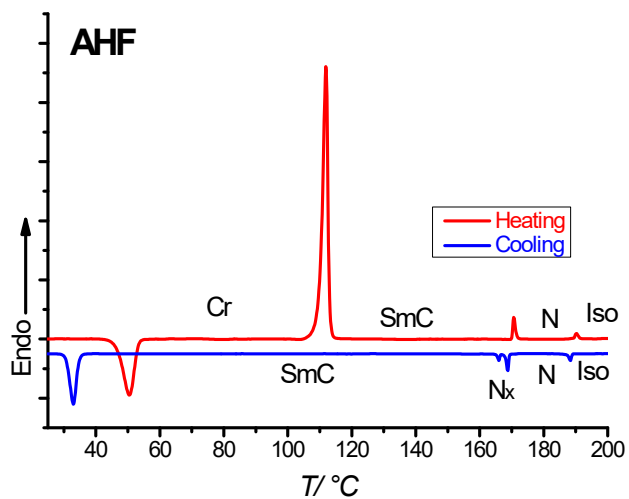

**Figure S15.** DSC heating and cooling traces for compound **AHF**.

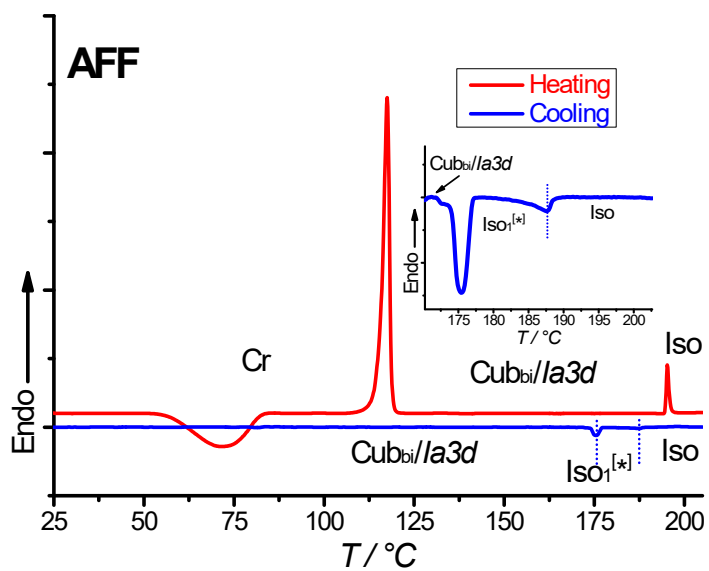

**Figure S16.** DSC heating and cooling traces of compound **AFF**. The inset in shows an enlarged view of the Iso-Iso<sub>1</sub><sup>[\*]</sup>-Cub<sub>bi</sub>/Ia $\bar{3}$ d transition on cooling.

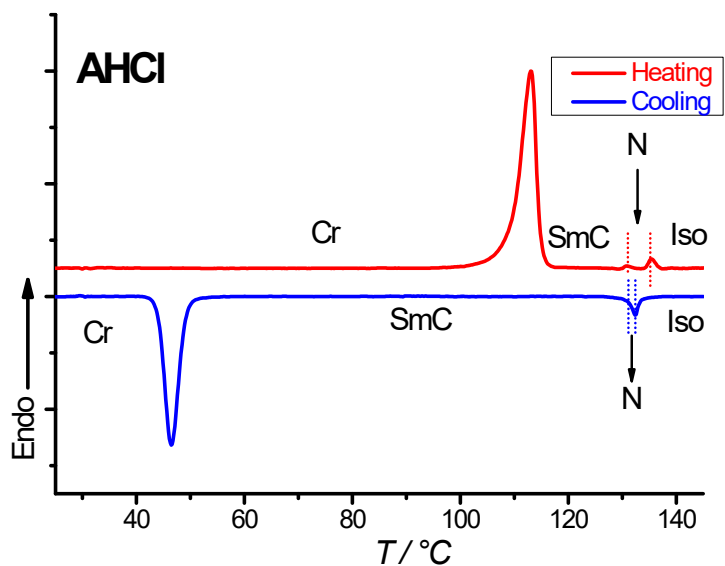

Figure S17. DSC heating and cooling traces of compound AHCl.

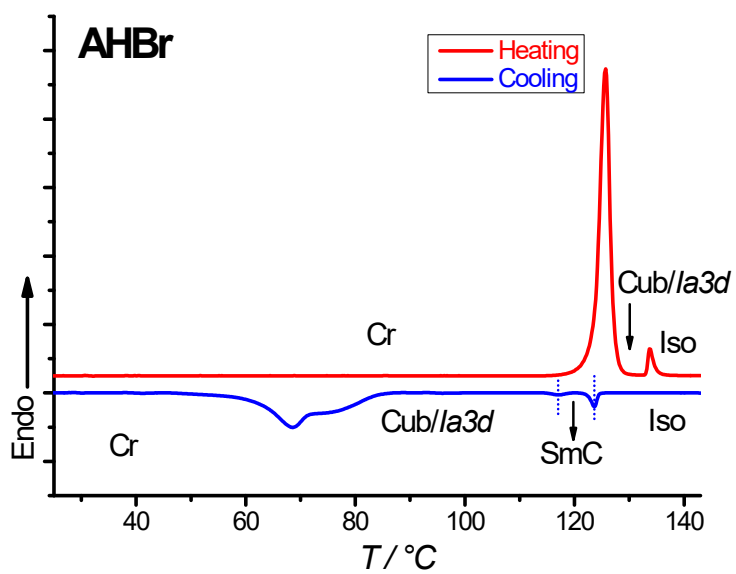

Figure S18. DSC heating and cooling traces of compound AHBr.

## 4. XRD

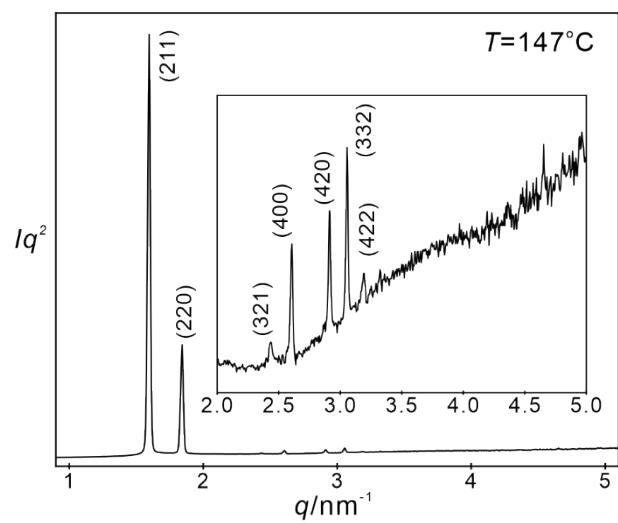

**Figure S19.** SAXS diffractogram of AFF.

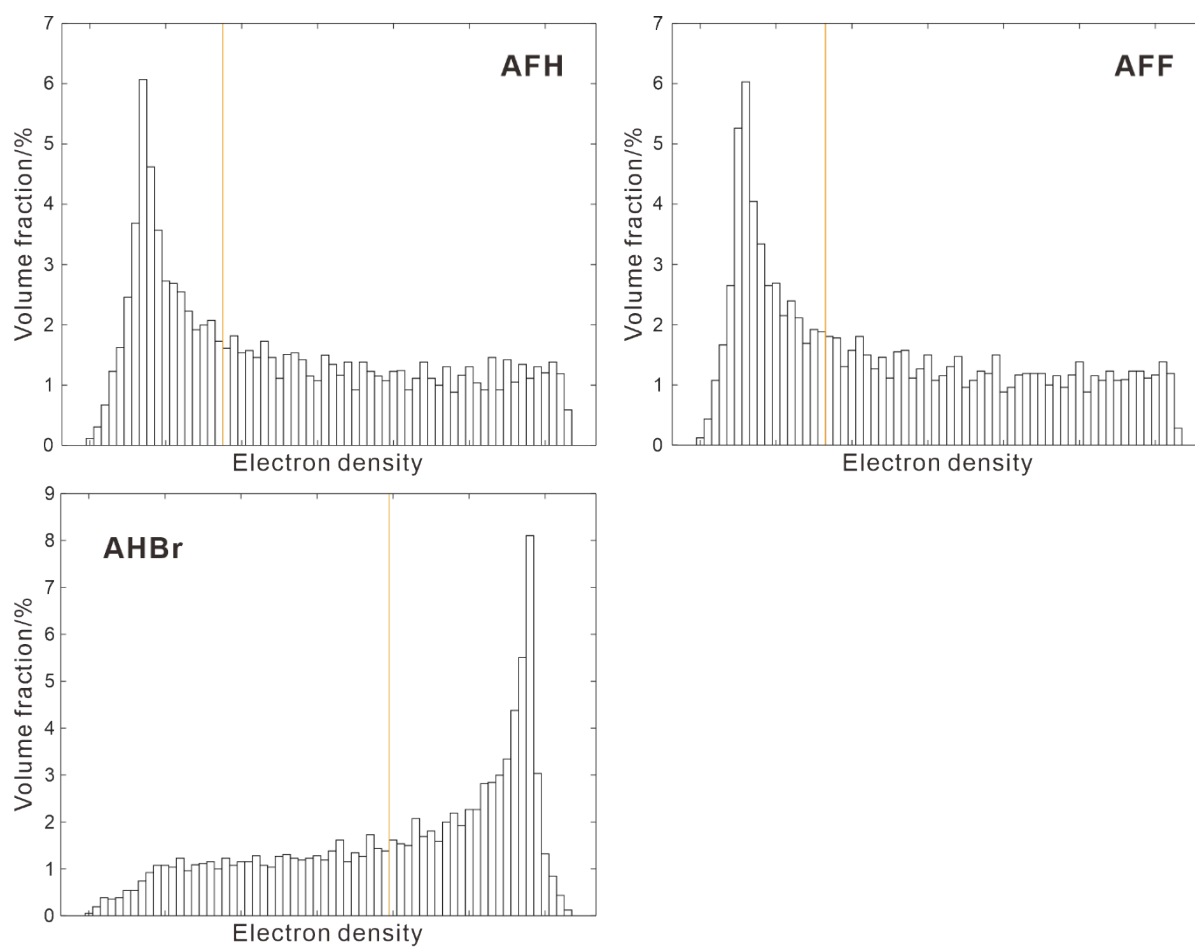

**Figure S20.** Electron density distribution histogram of AFH, AFF and AHBr.

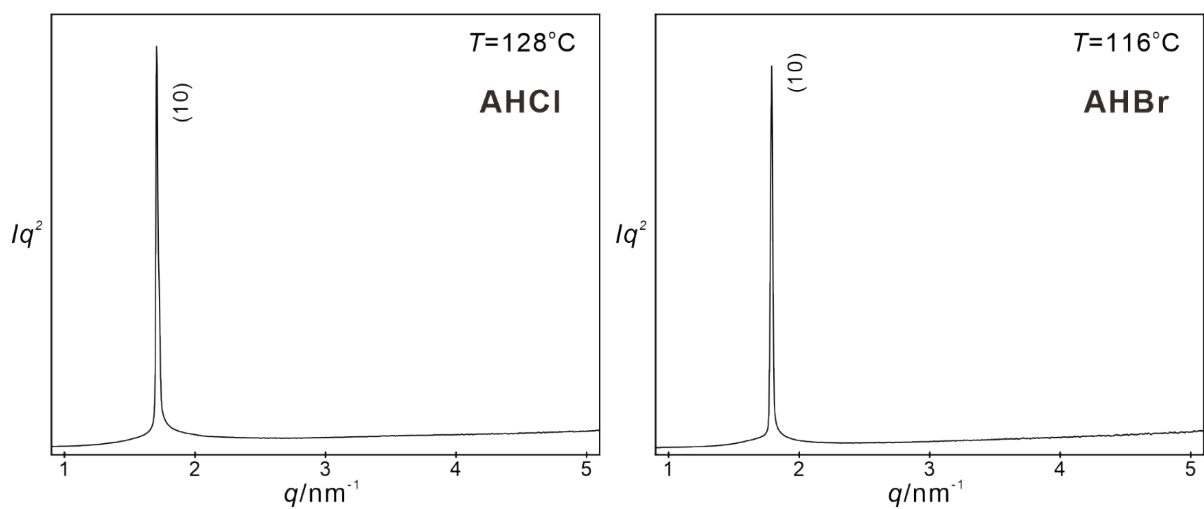

**Figure S21.** SAXS diffractograms of AHCl and AHBr.

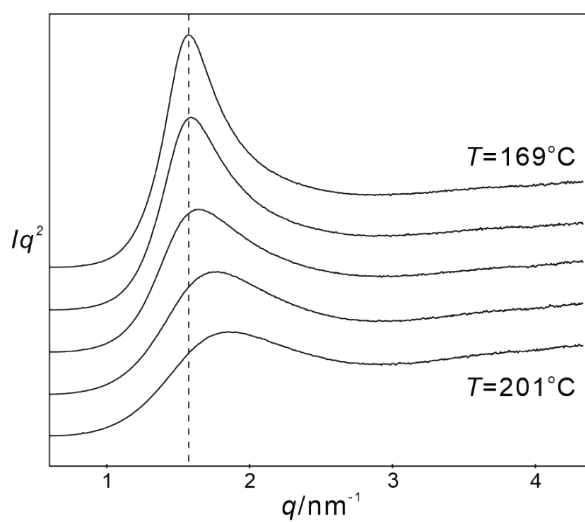

**Figure S22.** Temperature scan of AHF upon heating.

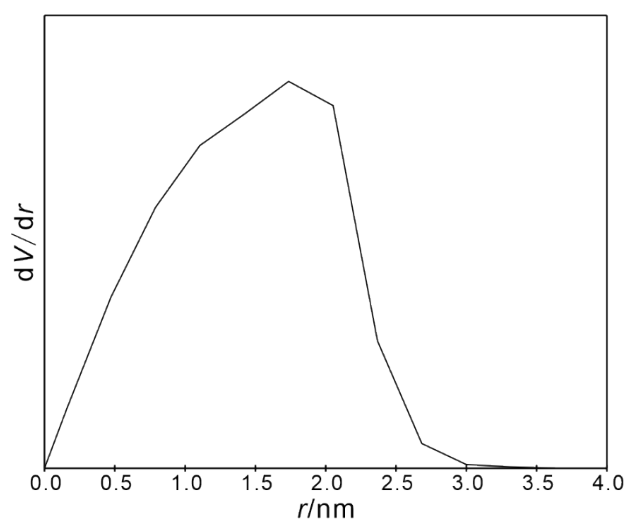

**Figure S23.**  $dV/dr$  curve of  $\text{Cub}_{\text{bi}}/Ia\bar{3}d$  phase of AHBr.

**Table S1** Experimental and calculated  $d$ -spacing of the observed SAXS reflection of the  $\text{Cub}_{\text{bi}}/Ia\bar{3}d$  phase of **AFH** at 128 °C. All intensity values are Lorentz and multiplicity corrected.

| $(hkl)$       | $d_{\text{obs.}}$ –spacing (nm) | $d_{\text{cal.}}$ –spacing (nm) | <i>intensity</i> | <i>phase</i> |
|---------------|---------------------------------|---------------------------------|------------------|--------------|
| (211)         | 3.98                            | 3.98                            | 100.0            | $\pi$        |
| (220)         | 3.45                            | 3.45                            | 53.6             | $\pi$        |
| (321)         | 2.61                            | 2.61                            | 0.2              | 0            |
| (400)         | 2.44                            | 2.44                            | 3.6              | 0            |
| (420)         | 2.18                            | 2.18                            | 1.3              | 0            |
| (332)         | 2.08                            | 2.08                            | 1.6              | 0            |
| (422)         | 1.99                            | 1.99                            | 0.3              | /            |
| (510)         | 1.91                            | 1.91                            | 0.03             | /            |
| (440)         | 1.72                            | 1.72                            | 0.2              | /            |
| (611)         | 1.58                            | 1.58                            | 0.06             | /            |
| $a = 9.75$ nm |                                 |                                 |                  |              |

**Table S2** Experimental and calculated  $d$ -spacing of the observed SAXS reflection of the SmC phase of **AHF** at 128 °C. All intensity values are Lorentz and multiplicity corrected.

| $(hk)$        | $d_{\text{obs.}}$ –spacing (nm) | $d_{\text{cal.}}$ –spacing (nm) | <i>intensity</i> | <i>phase</i> |
|---------------|---------------------------------|---------------------------------|------------------|--------------|
| (10)          | 3.84                            | 3.84                            | 100.0            | $\pi$        |
| $d = 3.84$ nm |                                 |                                 |                  |              |

**Table S3** Experimental and calculated  $d$ -spacing of the observed SAXS reflection of the  $\text{Cub}_{\text{bi}}/Ia\bar{3}d$  phase of **AFH** at 147 °C. All intensity values are Lorentz and multiplicity corrected.

| $(hk)$        | $d_{\text{obs.}}$ –spacing (nm) | $d_{\text{cal.}}$ –spacing (nm) | <i>intensity</i> | <i>phase</i> |
|---------------|---------------------------------|---------------------------------|------------------|--------------|
| (211)         | 3.94                            | 3.94                            | 100.0            | $\pi$        |
| (220)         | 3.41                            | 3.42                            | 53.7             | $\pi$        |
| (321)         | 2.58                            | 2.58                            | 0.1              | 0            |
| (400)         | 2.41                            | 2.41                            | 2.7              | 0            |
| (420)         | 2.16                            | 2.16                            | 0.7              | 0            |
| (332)         | 2.06                            | 2.06                            | 0.9              | 0            |
| (422)         | 1.97                            | 1.97                            | 0.2              | /            |
| $a = 9.66$ nm |                                 |                                 |                  |              |



**Table S4** Experimental and calculated  $d$ -spacing of the observed SAXS reflection of the SmC phase of **AHCl** at 128 °C. All intensity values are Lorentz and multiplicity corrected.

| $(hk)$                | $d_{\text{obs.}} - \text{spacing (nm)}$ | $d_{\text{cal.}} - \text{spacing (nm)}$ | $intensity$ | $phase$ |
|-----------------------|-----------------------------------------|-----------------------------------------|-------------|---------|
| (10)                  | 3.68                                    | 3.68                                    | 100.0       | $\pi$   |
| $d = 3.68 \text{ nm}$ |                                         |                                         |             |         |

**Table S5** Experimental and calculated  $d$ -spacing of the observed SAXS reflection of the  $\text{Cub}_{\text{bi}}/Ia\bar{3}d$  phase of **AHBr** at 125 °C. All intensity values are Lorentz and multiplicity corrected.

| $(hk)$                | $d_{\text{obs.}} - \text{spacing (nm)}$ | $d_{\text{cal.}} - \text{spacing (nm)}$ | $intensity$ | $phase$ |
|-----------------------|-----------------------------------------|-----------------------------------------|-------------|---------|
| (211)                 | 3.75                                    | 3.75                                    | 100.0       | 0       |
| (220)                 | 3.25                                    | 3.25                                    | 51.1        | 0       |
| (321)                 | 2.46                                    | 2.46                                    | 0.1         | 0       |
| (400)                 | 2.30                                    | 2.30                                    | 2.2         | $\pi$   |
| (420)                 | 2.06                                    | 2.05                                    | 0.5         | $\pi$   |
| (332)                 | 1.96                                    | 1.96                                    | 1.9         | $\pi$   |
| (422)                 | 1.88                                    | 1.88                                    | 0.3         | /       |
| (431)/(510)           | 1.80                                    | 1.80                                    | 0.2/0.4     | /       |
| $a = 9.19 \text{ nm}$ |                                         |                                         |             |         |

**Table S6** Experimental and calculated  $d$ -spacing of the observed SAXS reflection of the SmC phase of **AHBr** at 116 °C. All intensity values are Lorentz and multiplicity corrected.

| $(hk)$                | $d_{\text{obs.}} - \text{spacing (nm)}$ | $d_{\text{cal.}} - \text{spacing (nm)}$ | $intensity$ | $phase$ |
|-----------------------|-----------------------------------------|-----------------------------------------|-------------|---------|
| (10)                  | 3.51                                    | 3.51                                    | 100.0       | $\pi$   |
| $d = 3.51 \text{ nm}$ |                                         |                                         |             |         |

**Table S7** Structural information of  $\text{Cub}_{\text{bi}}/Ia\bar{3}d$  phase of **AFH** and **AFF**.

| $(hk)$     | $a_{\text{cub}}/\text{nm}$ | $n_{\text{cell}}^a$ | $L_{\text{seg}}/\text{nm}^b$ | $\Phi^{\circ c}$ | $n_{\text{raft}}^d$ |
|------------|----------------------------|---------------------|------------------------------|------------------|---------------------|
| <b>AFH</b> | 9.75                       | 617                 | 3.45                         | 9.19             | 3.35                |
| <b>AFF</b> | 9.64                       | 584                 | 3.41                         | 9.30             | 3.21                |

<sup>a</sup> Number of molecules per cell ( $n_{\text{cell}}$ ) is calculated by assuming the density of all compounds as 1g/cm<sup>3</sup>.

<sup>b</sup> Length of segment between neighboring three-way junctions ( $L_{\text{seg}}$ ) is calculated as  $0.354a_{\text{cub}}$ .

<sup>c</sup> Twisting angle of neighboring rafts ( $\Phi$ ) is calculated as  $70.5/(L_{\text{seg}}/0.45)$ .

<sup>d</sup> Number of molecules per raft ( $n_{\text{raft}}$ ) is calculated as  $n_{\text{cell}}/24/(L_{\text{seg}}/0.45)$ .

## 5. Fluorescence spectroscopy

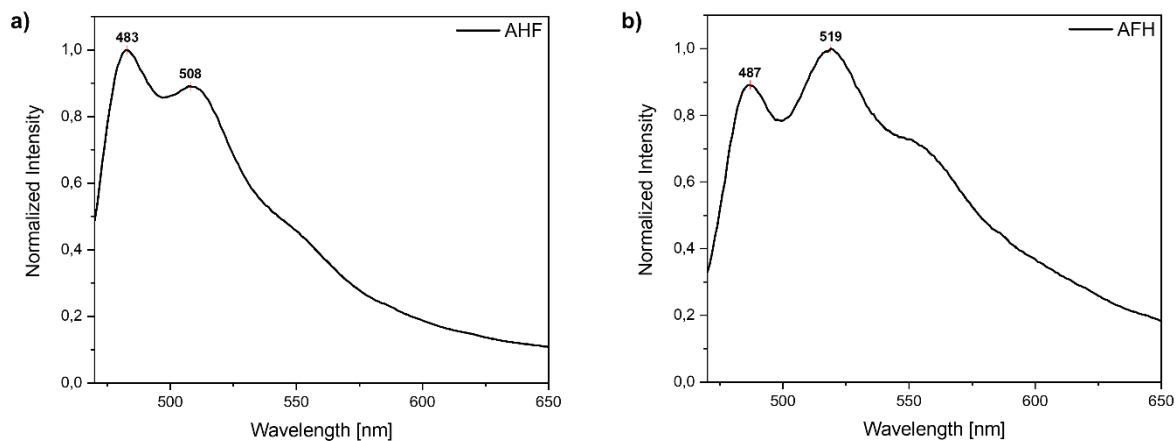

**Figure S24.** Normalized Emission spectra of solid-state emission of **AHF** (a, excitation wavelength 450 nm) and **AFH** (b, excitation wavelength 455 nm) at room temperature.

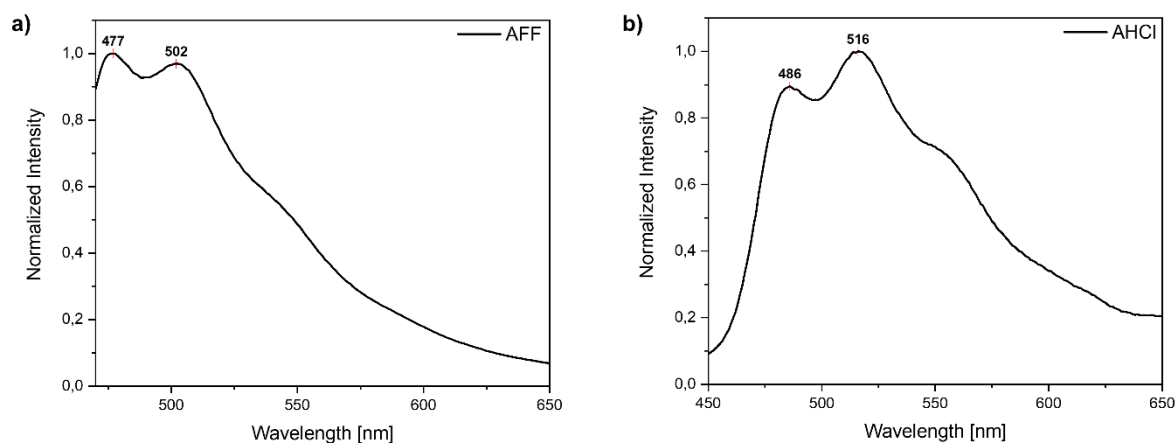

**Figure S25.** Normalized Emission spectra of solid-state emission of **AFF** (a, excitation wavelength 450 nm) and **AHCl** (b, excitation wavelength 450 nm) at room temperature.

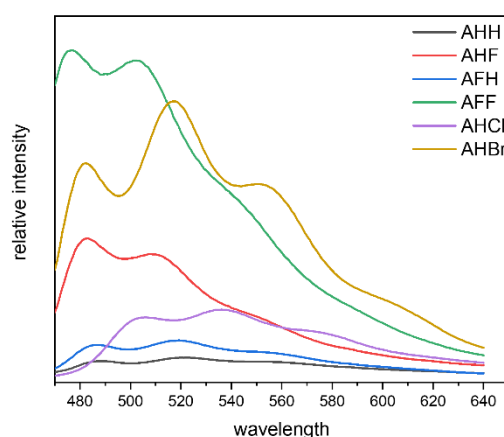

**Figure S26.** Relative Emission spectra of solid-state emission at room temperature of all polycatenars with ideal excitation wavelengths respectively.

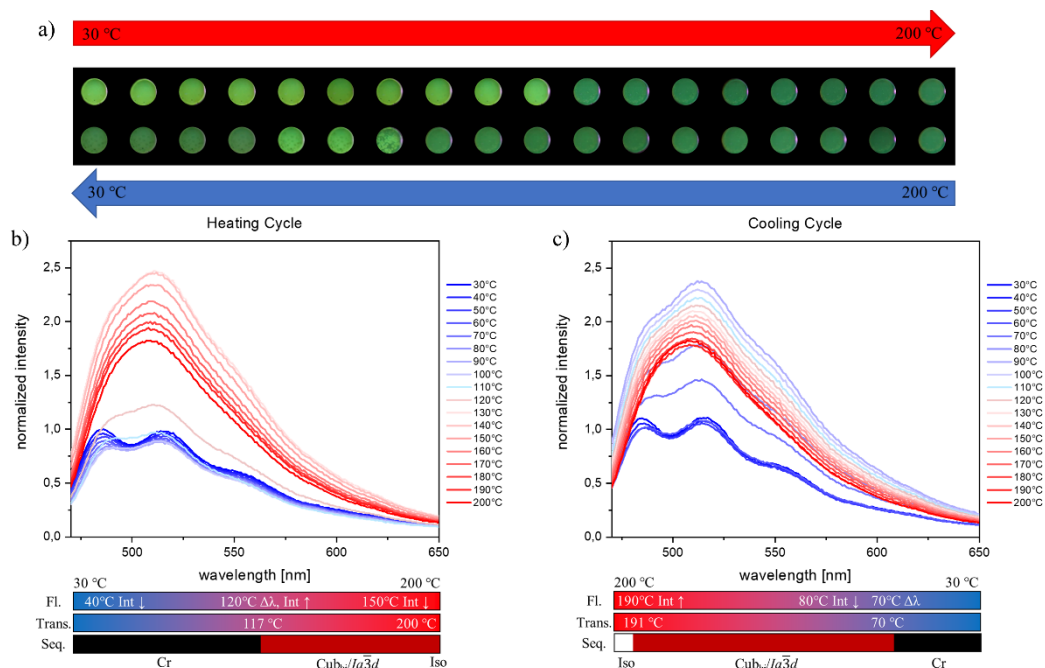

**Figure S27.** a) Photographs of **AFH** during heating and cooling under UV-light (395 nm). Pictures were taken every 10 °C for the heating and cooling cycle respectively. b) Normalized Emission spectra of **AFH** (excitation wavelength 450 nm) during the heating cycle. Starting with 30 °C data was collected every 10 °C until reaching 200 °C. c) Normalized Emission spectra of **AFH** (excitation wavelength 450 nm) during the cooling cycle. Starting with 200 °C data was collected every 10 °C until reaching 30 °C.

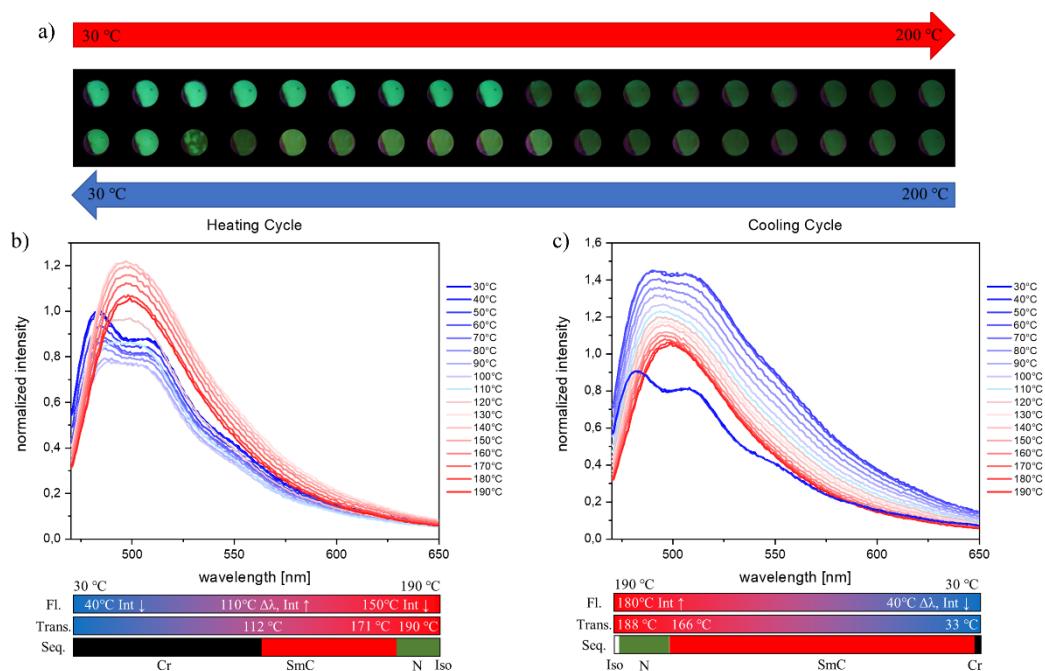

**Figure S28.** a) Photographs of **AHF** during heating and cooling under UV-light (395 nm). Pictures were taken every 10 °C for the heating and cooling cycle respectively. b) Normalized Emission spectra of **AHF** (excitation wavelength 450 nm) during the heating cycle. Starting with 30 °C data was collected every 10 °C until reaching 190 °C. c) Normalized Emission spectra of **AHF** (excitation wavelength 450 nm) during the cooling cycle. Starting with 190 °C data was collected every 10 °C until reaching 30 °C.

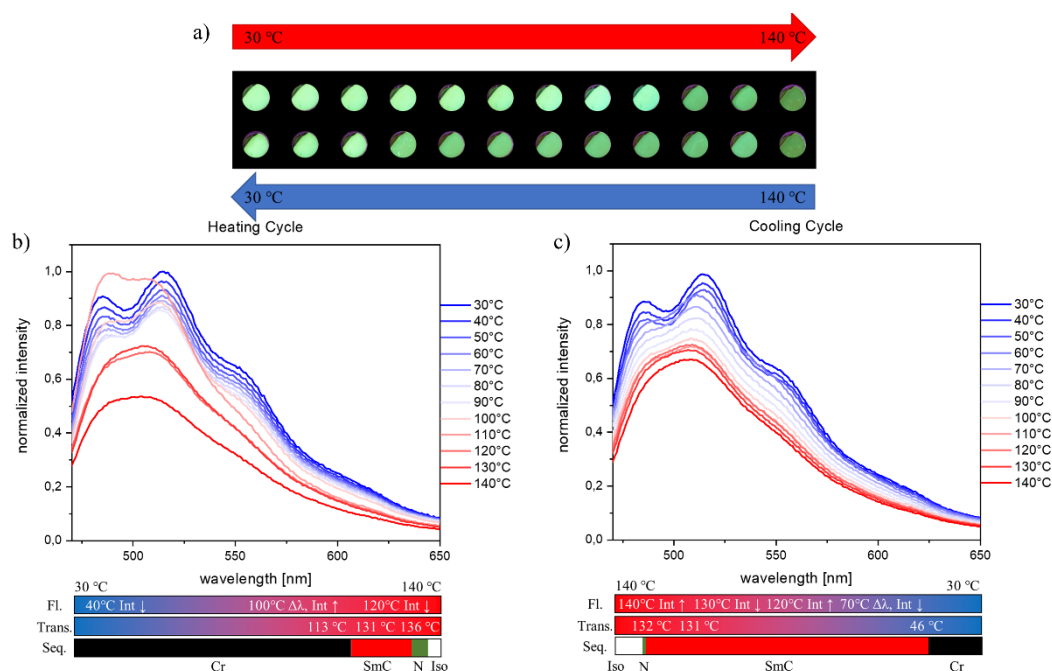

**Figure S29.** a) Photographs of **AHCI** during heating and cooling under UV-light (395 nm). Pictures were taken every 10 °C for the heating and cooling cycle respectively. b) Normalized Emission spectra of **AHCI** (excitation wavelength 450 nm) during the heating cycle. Starting with 30 °C data was collected every 10 °C until reaching 140 °C. c) Normalized Emission spectra of **AHCI** (excitation wavelength 450 nm) during the cooling cycle. Starting with 140 °C data was collected every 10 °C until reaching 30 °C.

## 6. References

1. T. Reppe, S. Poppe and C. Tschierske, *Chem. Eur. J.* 2020, **26**, 16066.
2. M. Alaasar, A. F. Darweesh, C. Anders, K. Iakoubovskii and M. Yoshio, *Mater. Adv.* 2024, **5**, 561.
